# Supplementary material for: Sources of PM 2.5 carbonaceous aerosol in Riyadh, Saudi Arabia
Source: Copernicus journal article supplement (doi:10.5194/acp-2017-829), 2017-09-20
Supplement: Supplementary file 1 [file acp-2017-829-supplement.pdf]

# Sources of PM<sub>2.5</sub> carbonaceous aerosol in Riyadh, Saudi Arabia

*Qijing Bian<sup>1</sup>, Badr Alharbi<sup>2</sup>, Mohammed M. Shareef<sup>2</sup>, Tahir Husain<sup>2</sup>, Mohammad J. Pasha<sup>1</sup>,  
Sam. A. Atwood<sup>1</sup>, Sonia M. Kreidenweis<sup>1,\*</sup>*

<sup>1</sup>Department of Atmospheric Science, Colorado State University, Fort Collins, CO, 80526, USA.

<sup>2</sup>National Center for Environmental Technology, King Abdulaziz City for Science and Technology, P.O. Box 6086, Riyadh 11442, Saudi Arabia.

<sup>3</sup>Faculty of Engineering and Applied Science, Memorial University, St. John's, NL, A1B 3X5  
Canada.

\*Corresponding author: [bianqj@atmos.colostate.edu](mailto:bianqj@atmos.colostate.edu) and [sonia@atmos.colostate.edu](mailto:sonia@atmos.colostate.edu)

Table S1 Summary of sampling sites, dates and average concentration ( $\mu\text{g m}^{-3}$ ) for OC and EC measurements (after Alharbi et al. 2014). Grid cells are shown in Figure 1.

| Sampling cell | Designation                                                                                                                                  | Type        | Approx. number industrial sources | Cycle 1                                         | Cycle 2            | OC        | EC        |
|---------------|----------------------------------------------------------------------------------------------------------------------------------------------|-------------|-----------------------------------|-------------------------------------------------|--------------------|-----------|-----------|
| 1             | SW corner, semirural                                                                                                                         | Outskirts   | 9                                 | Apr 8-14, 16-24, 28-30;<br>May 1-5, 7-15, 20-21 |                    | 3.84±4.27 | 1.14±1.06 |
| 2             | Residential and some small scale industrial area (suburban area)                                                                             | Residential | 187                               |                                                 | Jul 3-8            | 4.83±1.95 | 1.73±1.37 |
| 3             | Moderately populated residential area with car salvage yards and some agricultural farms (suburban area)                                     | Residential | 25                                | May 22-27                                       |                    | 1.56±1.54 | 0.24±0.26 |
| 4             | Industrial area (urban area)                                                                                                                 | Industrial  | 658                               |                                                 | Jul 9-14           | 8.53±3.63 | 4.45±3.47 |
| 5             | Residential densely populated area (urban area)                                                                                              | Residential | 102                               | May 30-31, June 2                               |                    | 6.07±7.90 | 3.36±2.17 |
| 6             | Commercial, industrial and residential very densely populated area with city sewage wastewater treatment plants (urban area)                 | Residential | 344                               |                                                 | Jul 15-19          | 4.35±3.27 | 2.89±2.45 |
| 7             | Industrial and residential area with a cement factory situated in this area with continual stone crushing operations activities (urban area) | Industrial  | 289                               | Jun 3, 5-8                                      |                    | 7.27±1.86 | 5.07±3.43 |
| 8             | Semi industrial area with commercial train route passing through (suburban area)                                                             | Industrial  | 20                                |                                                 | Aug 28-31, Sep 1-2 | 5.58±4.67 | 2.74±3.43 |
| 9             | Residential area mostly covered with agricultural land (suburban area)                                                                       | Residential | 12                                | Jun 9-14                                        |                    | 6.52±3.63 | 2.64±1.67 |
| 10            | Residential area (urban area)                                                                                                                | Residential | 130                               |                                                 | Sep 3-8            | 3.34±1.30 | 1.51±0.96 |
| 11            | Residential and semi industrial area with number of automobile workshops (urban area)                                                        | Industrial  | 394                               | Jun 15-20                                       |                    | 5.18±2.88 | 3.03±2.28 |

|    |                                                                                                               |             |    |               |           |            |           |
|----|---------------------------------------------------------------------------------------------------------------|-------------|----|---------------|-----------|------------|-----------|
| 12 | This area is considered a residential area with a number of automobile workshops (suburban area)              | Residential | 0  |               | Sep 10-14 | N/A        | N/A       |
| 13 | Semi background/residential area (semirural area)                                                             | Residential | 5  | Jun 21-26     |           | 3.22±2.19  | 0.93±0.88 |
| 14 | Residential area with extended construction activities (suburban area)                                        | Residential | 8  |               | Sep 15-20 | N/A        | N/A       |
| 15 | Residential area (suburban area)                                                                              | Residential | 44 | June 28-Jul 2 |           | 1.78±1.51  | 1.71±1.40 |
| 16 | Semi background with small populated residential area and large non-agricultural vacant land (semirural area) | Residential | 4  |               | Sep 21-26 | 12.49±5.30 | 6.44±4.00 |

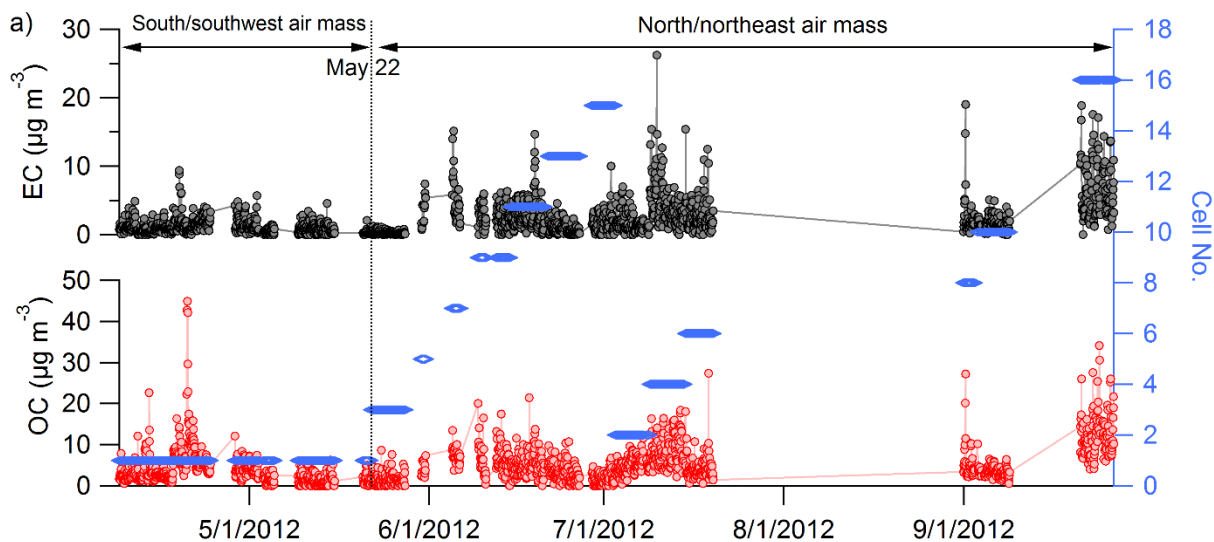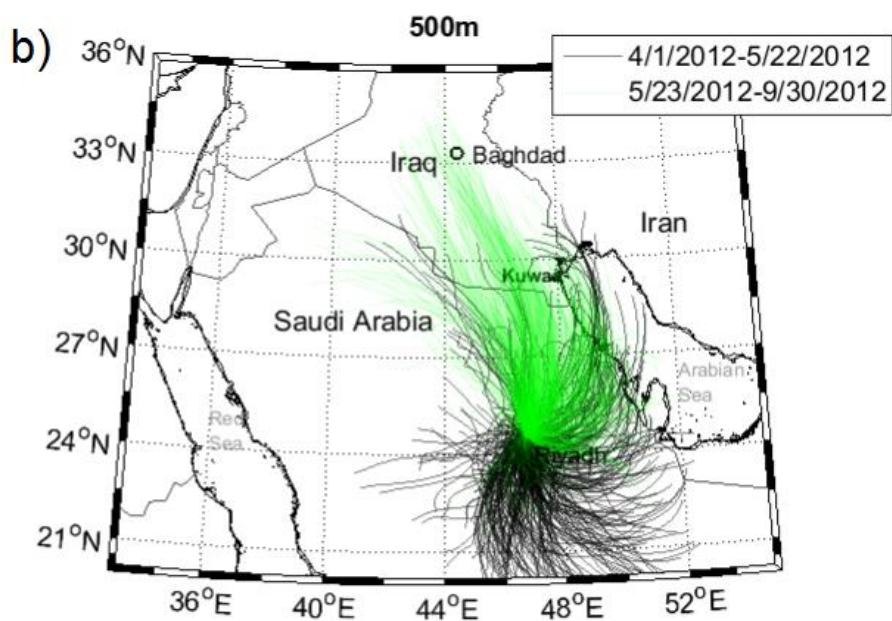

Figure S1 a) Time series of OC and EC measurements and the corresponding sampling cells at Riyadh in 2012; b) 24 hr back trajectories (starting height of 500 m) for the sampling period April 1 – May 22 (black lines) and May 23 – September 30 (green lines), 2012.

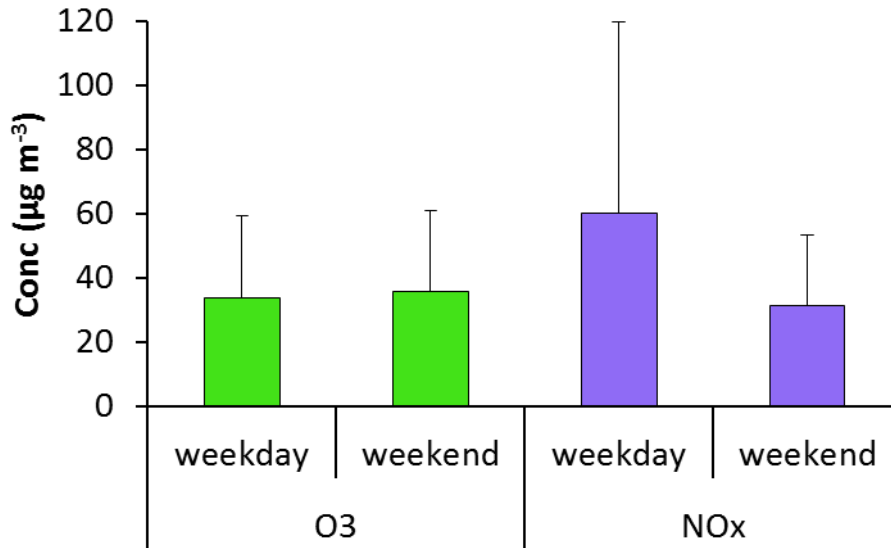

Figure S2 Weekday-weekend variation of O<sub>3</sub> and NO<sub>x</sub> concentrations ( $\mu\text{g m}^{-3}$ ).

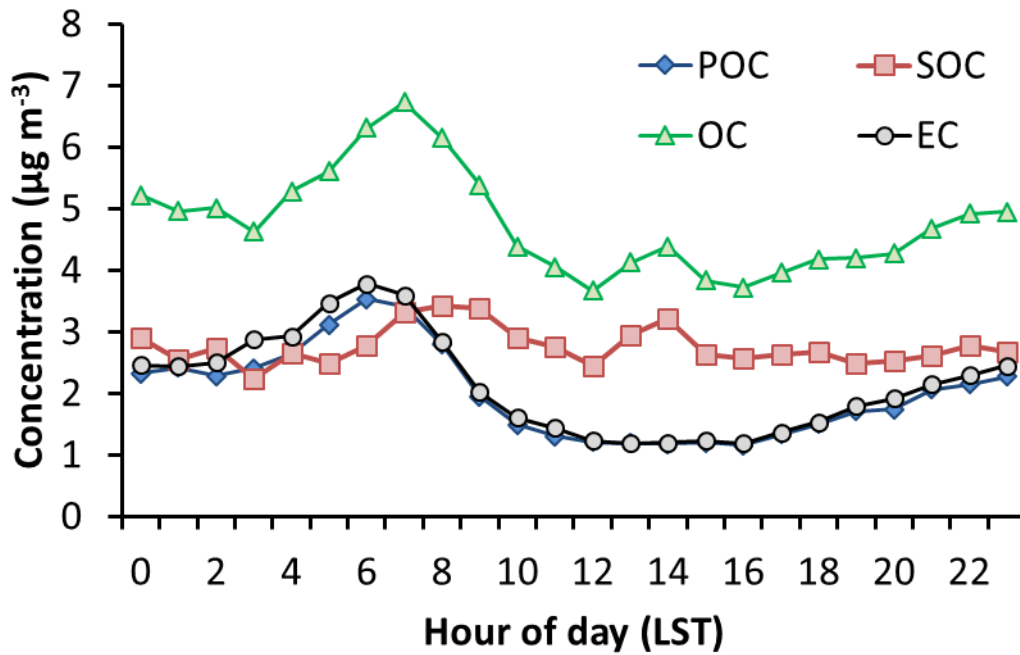

Figure S3 Diurnal variation of POC, SOC, OC and EC concentrations ( $\mu\text{g m}^{-3}$ )

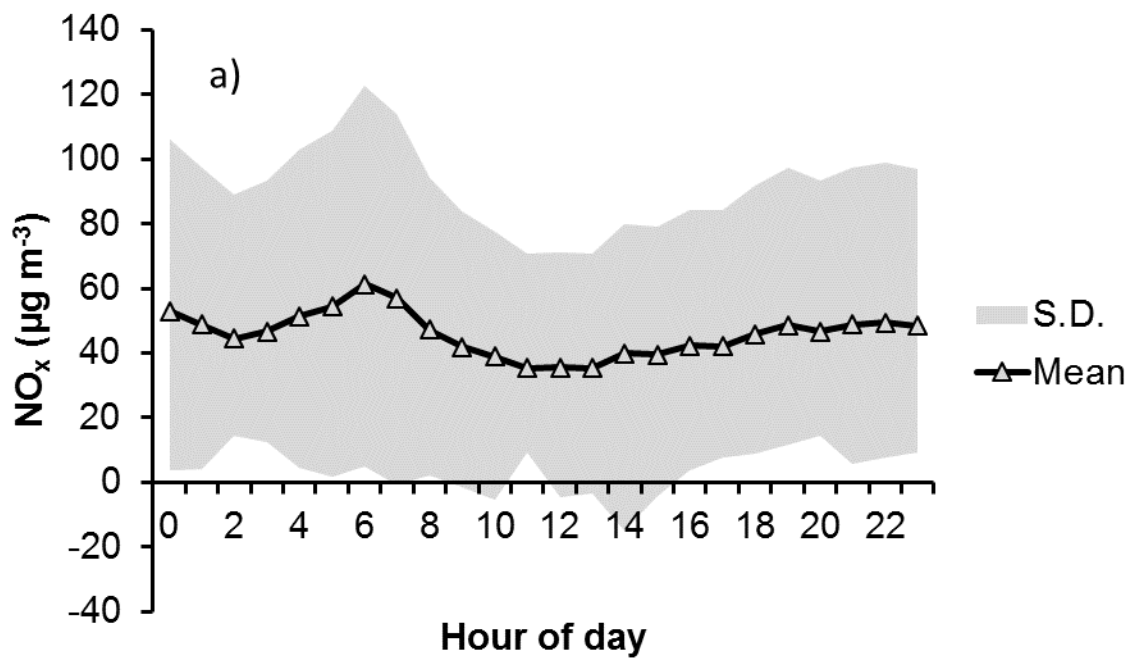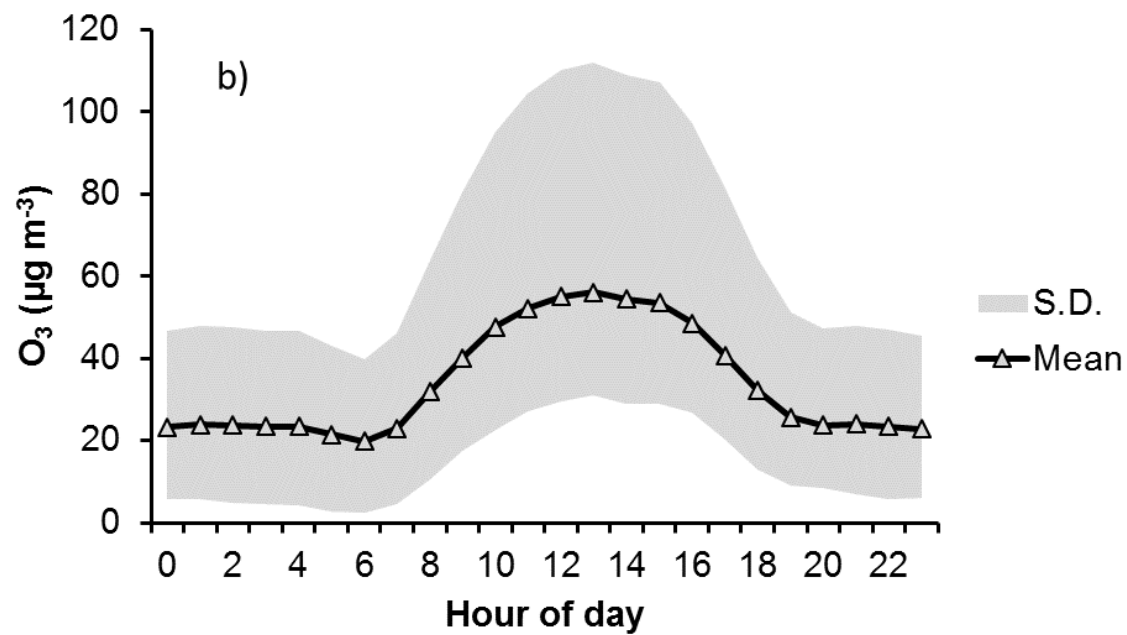

Figure S4 Hourly variation of a) NO<sub>x</sub> and b) O<sub>3</sub> (µg m<sup>-3</sup>) during the observational periods.

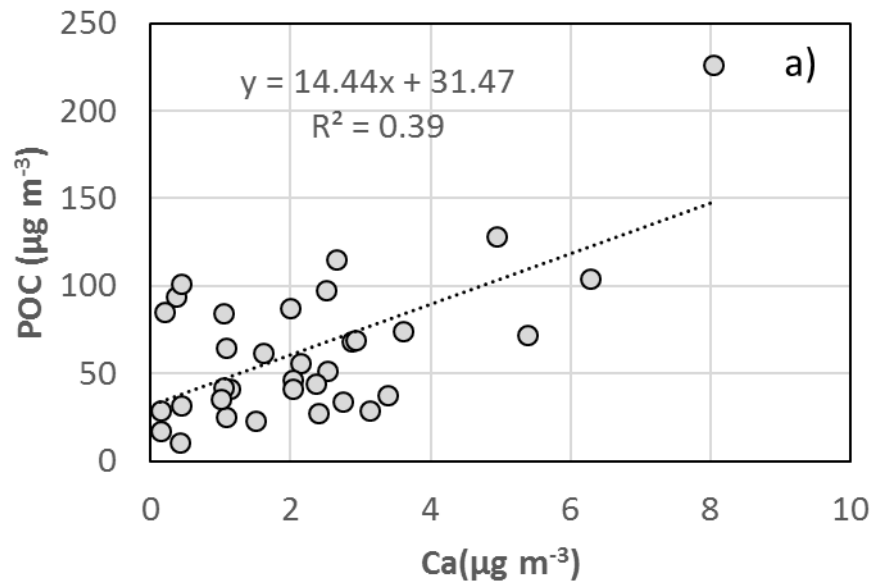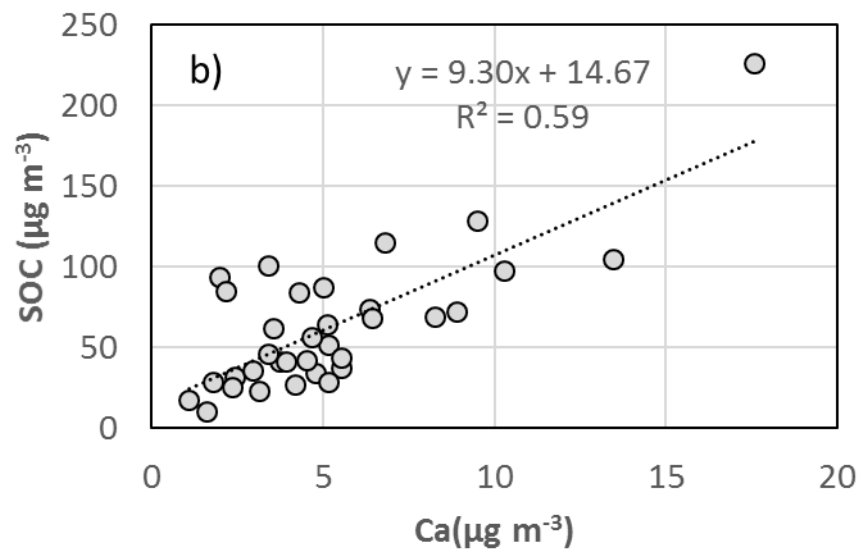

Figure S5 a) Correlation between POC and Ca ( $\mu\text{g m}^{-3}$ ) and b) correlation between SOC and Ca ( $\mu\text{g m}^{-3}$ )

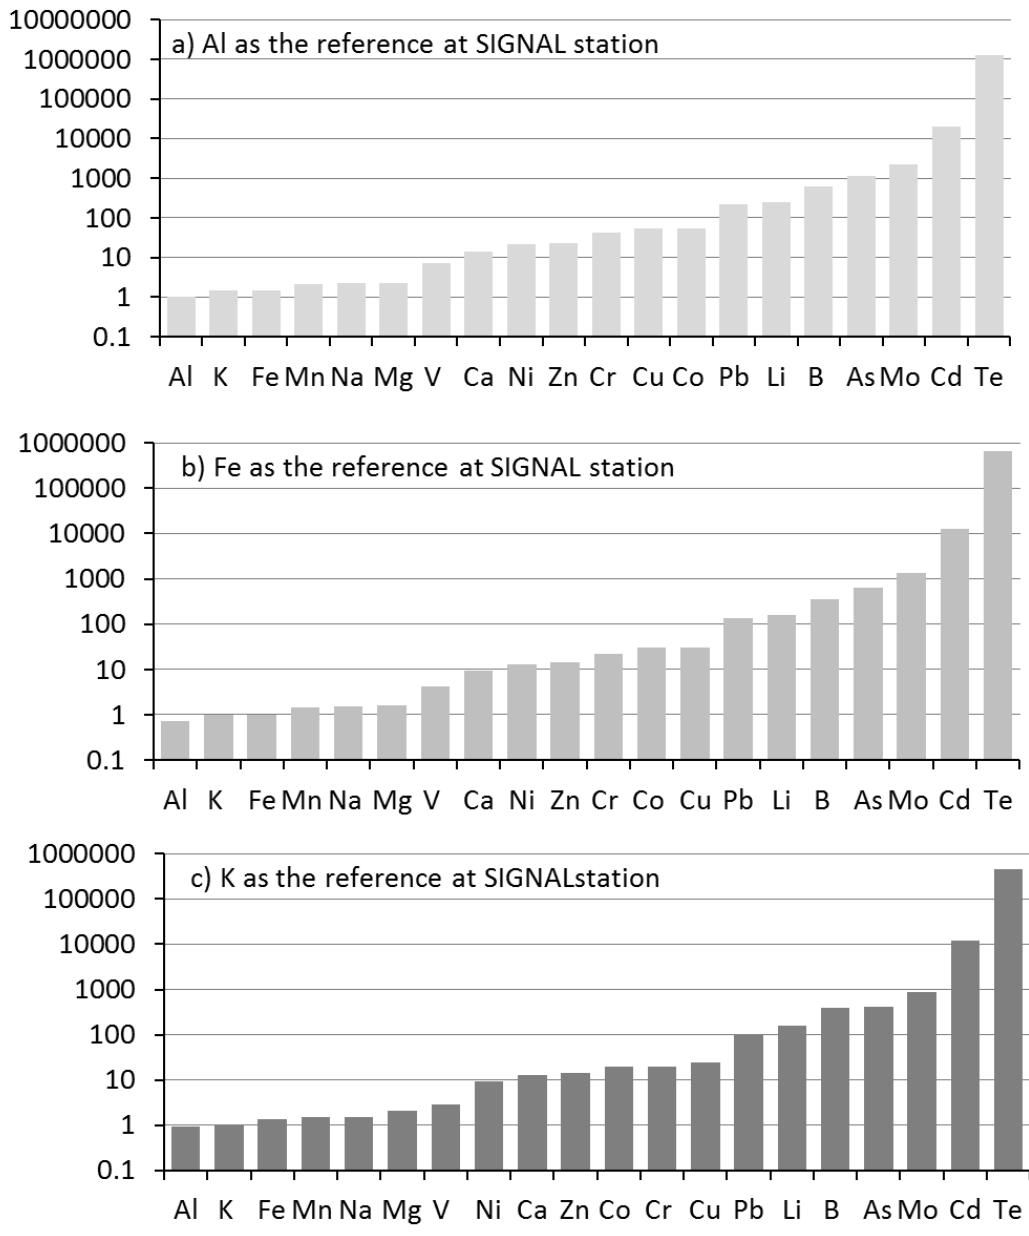

Figure S6 Enrichment factor calculation a) using Al as the reference species; b) using Fe as the reference species; c) using K as the reference species.



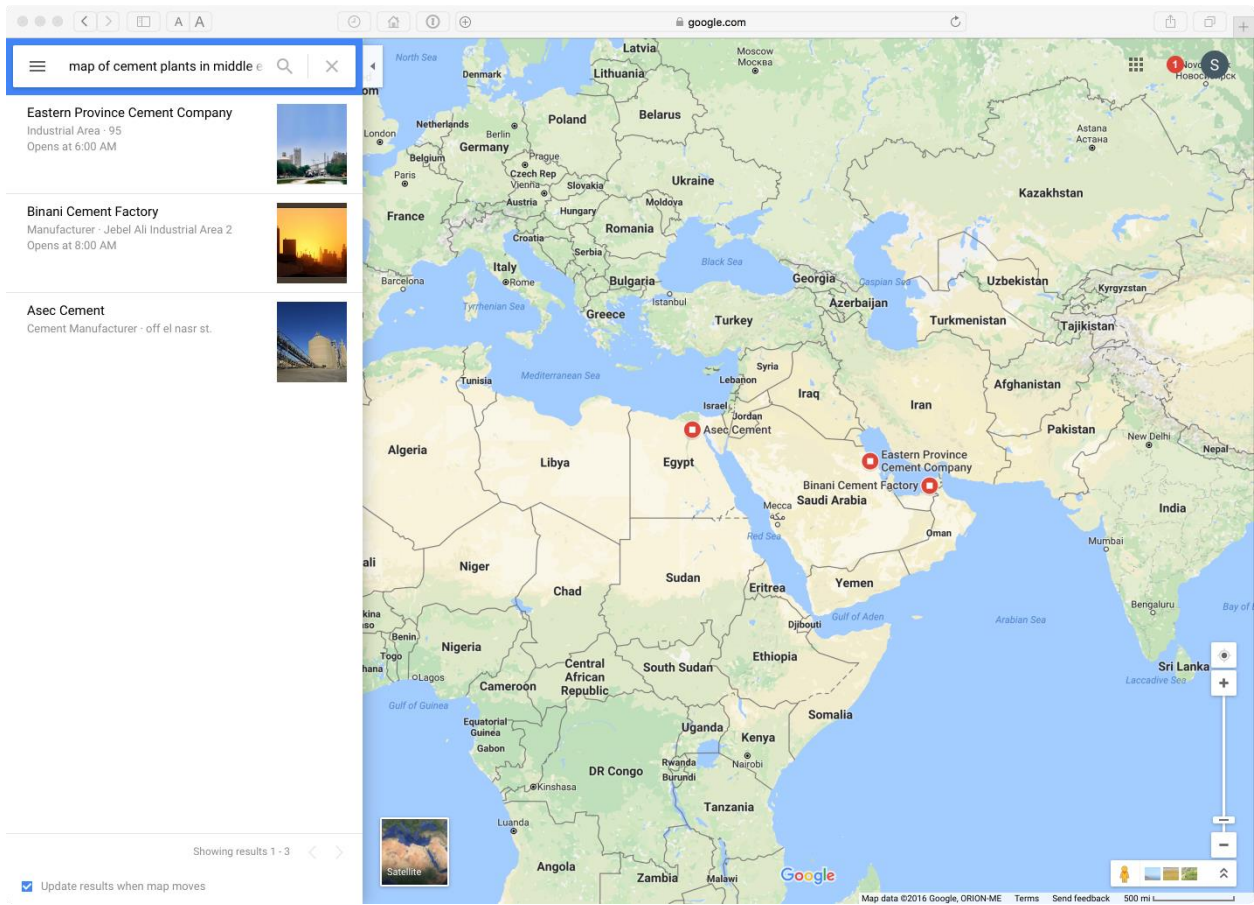

Figure S7 Locations of cement plants, via a search in Google Maps.

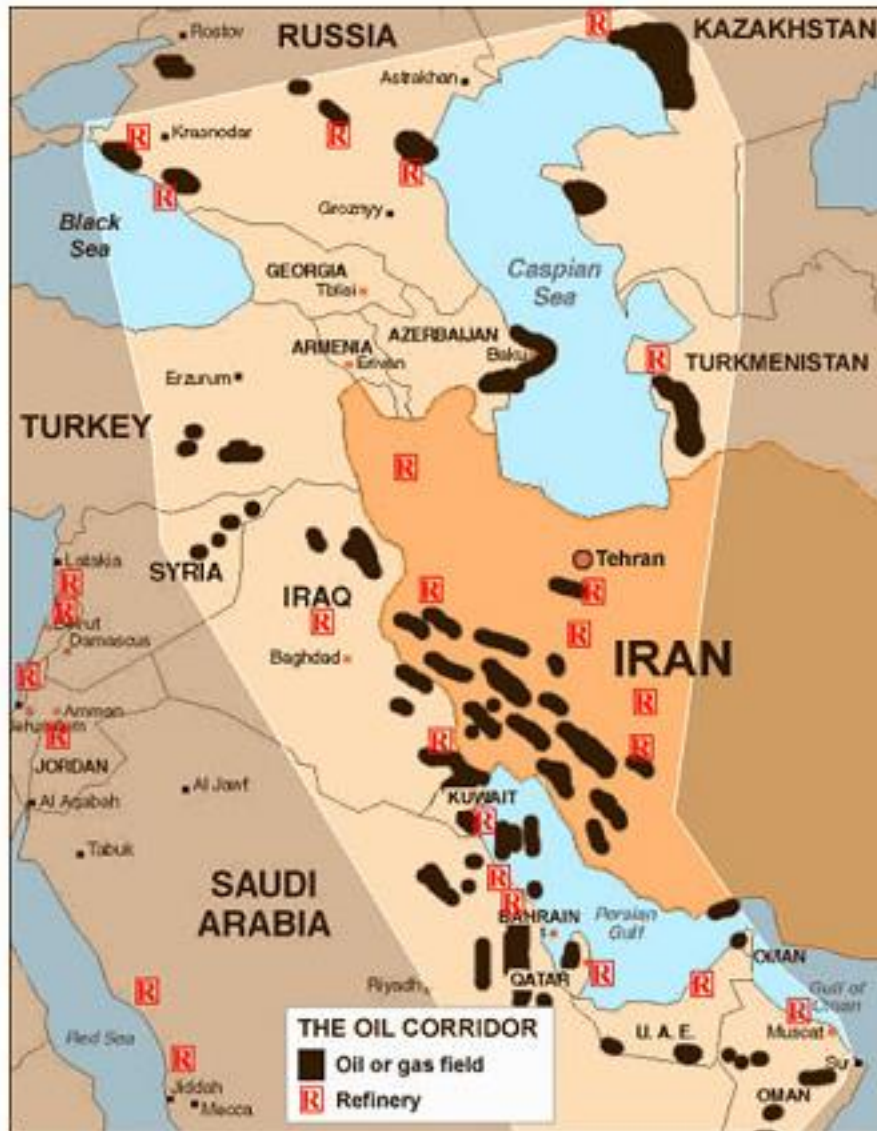

Figure S8: Map indicating the distribution of oil or gas fields and refineries. Available at: <http://www.silverbearcafe.com/private/11.10/images/nigelmaund102010A.jpg>
